# Supplementary material for: Analysis of Food Habits during Pandemic in a Polish Population-Based Sample of Primary School Adolescents: Diet and Activity of Youth during COVID-19 (DAY-19) Study
Source: MDPI journal article supplement (doi:10.3390/nu13113711), 2021-10-22
Supplement: s1 [file s1]

Supplementary Materials

# Analysis of Food Habits during Pandemic in a Polish Population-Based Sample of Primary School Adolescents: Diet and Activity of Youth During COVID-19 (DAY-19) Study

Aleksandra Kołota \* and Dominika Głąbska

Department of Dietetics, Institute of Human Nutrition Sciences, Warsaw University of Life Sciences (SGGW-WULS), 159c Nowoursynowska Street, 02-776 Warsaw, Poland; dominika\_glabska@sggw.edu.pl (D.G.)

\* Correspondence: aleksandra\_kolota@sggw.edu.pl; Tel.: +48-22-5937186

**Table S1.** The food purchase habits assessed while using Adolescents' Food Habits Checklist (AFHC) in the period before the COVID-19 pandemic, as declared by the adolescents from the Diet and Activity of Youth during COVID-19 (DAY-19) Study cohort (n = 1,333), stratified by gender.

| Food purchase habits assessed within AFHC*                                               |                | Girls (n=710) | Boys (n=623) | p**    |
|------------------------------------------------------------------------------------------|----------------|---------------|--------------|--------|
| If I am having lunch away from home, I often choose a low-fat option                     | True           | 302 (42.5%)   | 236 (37.9%)  | 0.1023 |
|                                                                                          | False          | 210 (29.6%)   | 182 (29.2%)  |        |
|                                                                                          | Not applicable | 198 (27.9%)   | 205 (32.9%)  |        |
| If I am buying crisps, I often choose a low-fat brand                                    | True           | 151 (21.3%)   | 150 (24.1%)  | 0.2405 |
|                                                                                          | False          | 425 (59.9%)   | 374 (60.0%)  |        |
|                                                                                          | Not applicable | 134 (18.8%)   | 99 (15.9%)   |        |
| I often buy pastries or cakes                                                            | True           | 261 (36.8%)   | 188 (30.2%)  | 0.0112 |
|                                                                                          | False          | 449 (63.2%)   | 435 (69.8%)  |        |
| I rarely eat takeaway meals                                                              | True           | 581 (81.8%)   | 504 (80.9%)  | 0.6629 |
|                                                                                          | False          | 129 (18.2%)   | 119 (19.1%)  |        |
| When I am buying a soft drink, I usually choose a diet drink                             | True           | 285 (40.1%)   | 196 (31.5%)  | 0.0009 |
|                                                                                          | False          | 425 (59.9%)   | 427 (68.5%)  |        |
| If I am having a dessert or pudding in a restaurant, I usually choose the healthiest one | True           | 117 (16.5%)   | 97 (15.6%)   | 0.2319 |
|                                                                                          | False          | 319 (44.9%)   | 257 (41.2%)  |        |
|                                                                                          | Not applicable | 274 (38.6%)   | 269 (43.2%)  |        |

\* AFHC – Adolescents' Food Habits Checklist [37]; \*\*  $\chi^2$  test.

**Table S2.** The food purchase habits assessed while using Adolescents' Food Habits Checklist (AFHC) in the period during the COVID-19 pandemic, as declared by the adolescents from the Diet and Activity of Youth during COVID-19 (DAY-19) Study cohort (n = 1,333), stratified by gender.

| Food purchase habits assessed within AFHC*                                               |                | Girls (n=710) | Boys (n=623) | p**    |
|------------------------------------------------------------------------------------------|----------------|---------------|--------------|--------|
| If I am having lunch away from home, I often choose a low-fat option                     | True           | 253 (35.6%)   | 203 (32.6%)  | 0.3161 |
|                                                                                          | False          | 196 (27.6%)   | 169 (27.1%)  |        |
|                                                                                          | Not applicable | 261 (36.8%)   | 254 (59.7%)  |        |
| If I am buying crisps, I often choose a low-fat brand                                    | True           | 170 (23.9%)   | 161 (25.8%)  | 0.0175 |
|                                                                                          | False          | 372 (52.4%)   | 354 (56.8%)  |        |
|                                                                                          | Not applicable | 168 (23.7%)   | 108 (17.4%)  |        |
| I often buy pastries or cakes                                                            | True           | 163 (22.9%)   | 159 (25.5%)  | 0.2751 |
|                                                                                          | False          | 547 (77.1%)   | 464 (74.5%)  |        |
| I rarely eat takeaway meals                                                              | True           | 597 (84.1%)   | 511 (82.0%)  | 0.3159 |
|                                                                                          | False          | 113 (15.9%)   | 112 (18.0%)  |        |
| When I am buying a soft drink, I usually choose a diet drink                             | True           | 318 (44.8%)   | 212 (34.0%)  | 0.0001 |
|                                                                                          | False          | 392 (55.2%)   | 411 (66.0%)  |        |
| If I am having a dessert or pudding in a restaurant, I usually choose the healthiest one | True           | 127 (17.9%)   | 99 (15.9%)   | 0.3360 |
|                                                                                          | False          | 291 (40.9%)   | 244 (39.2%)  |        |
|                                                                                          | Not applicable | 292 (41.2%)   | 280 (44.9%)  |        |

\* AFHC – Adolescents' Food Habits Checklist [37]; \*\* chi<sup>2</sup> test.

**Table S3.** The food preparation habits assessed while using Adolescents' Food Habits Checklist (AFHC) in the period before the COVID-19 pandemic, as declared by the adolescents from the Diet and Activity of Youth during COVID-19 (DAY-19) Study cohort (n = 1,333), stratified by gender.

| Food preparation habits assessed within AFHC*                                                       |                | Girls (n=710) | Boys (n=623) | p**    |
|-----------------------------------------------------------------------------------------------------|----------------|---------------|--------------|--------|
| I usually avoid eating fried foods                                                                  | True           | 305 (42.9%)   | 204 (32.7%)  | 0.0001 |
|                                                                                                     | False          | 405 (57.1%)   | 419 (67.3%)  |        |
| I try to keep my overall fat intake down                                                            | True           | 404 (56.9%)   | 320 (51.4%)  | 0.0429 |
|                                                                                                     | False          | 306 (43.1%)   | 303 (48.6%)  |        |
| I try to keep my overall sugar intake down                                                          | True           | 399 (56.2%)   | 342 (54.9%)  | 0.6330 |
|                                                                                                     | False          | 311 (43.8%)   | 281 (45.1%)  |        |
| If I am having a dessert at home, I try to have something low in fat                                | True           | 231 (32.5%)   | 202 (32.4%)  | 0.7929 |
|                                                                                                     | False          | 357 (50.3%)   | 322 (51.7%)  |        |
|                                                                                                     | Not applicable | 122 (17.2%)   | 99 (15.9%)   |        |
| I usually eat at least one serving of vegetables (excluding potatoes) or salad with my evening meal | True           | 528 (74.4%)   | 478 (76.7%)  | 0.3178 |
|                                                                                                     | False          | 182 (25.6%)   | 145 (23.3%)  |        |
| When I put butter or margarine on bread, I usually spread it thinly                                 | True           | 485 (68.3%)   | 431 (69.2%)  | 0.0134 |
|                                                                                                     | False          | 92 (12.9%)    | 106 (17.0%)  |        |
|                                                                                                     | Not applicable | 133 (18.8%)   | 86 (13.8%)   |        |
| If I have a packed lunch, I usually include some chocolate and/or biscuits                          | True           | 253 (35.6%)   | 182 (29.2%)  | 0.0305 |
|                                                                                                     | False          | 387 (54.5%)   | 364 (58.4%)  |        |
|                                                                                                     | Not applicable | 70 (9.9%)     | 77 (12.4%)   |        |
| I often have cream on desserts                                                                      | True           | 154 (21.7%)   | 134 (21.5%)  | 0.0937 |
|                                                                                                     | False          | 484 (68.2%)   | 402 (64.5%)  |        |
|                                                                                                     | Not applicable | 72 (10.1%)    | 87 (14.0%)   |        |

\* AFHC – Adolescents' Food Habits Checklist [37]; \*\* chi<sup>2</sup> test.

**Table S4.** The food preparation habits assessed while using Adolescents' Food Habits Checklist (AFHC) in the period during the COVID-19 pandemic, as declared by the adolescents from the Diet and Activity of Youth during COVID-19 (DAY-19) Study cohort (n = 1,333), stratified by gender.

| Food preparation habits assessed within AFHC*                                                       |                | Girls (n=710) | Boys (n=623) | p**     |
|-----------------------------------------------------------------------------------------------------|----------------|---------------|--------------|---------|
| I usually avoid eating fried foods                                                                  | True           | 334 (47.0%)   | 202 (32.4%)  | 1.0000  |
|                                                                                                     | False          | 376 (53.0%)   | 421 (67.6%)  |         |
| I try to keep my overall fat intake down                                                            | True           | 463 (65.2%)   | 337 (54.1%)  | <0.0001 |
|                                                                                                     | False          | 247 (34.8%)   | 286 (45.9%)  |         |
| I try to keep my overall sugar intake down                                                          | True           | 461 (64.9%)   | 461 (73.9%)  | 0.6444  |
|                                                                                                     | False          | 249 (35.1%)   | 262 (26.1%)  |         |
| If I am having a dessert at home, I try to have something low in fat                                | True           | 269 (37.9%)   | 214 (34.3%)  | 0.0846  |
|                                                                                                     | False          | 322 (45.3%)   | 320 (51.4%)  |         |
|                                                                                                     | Not applicable | 119 (16.8%)   | 89 (14.3%)   |         |
| I usually eat at least one serving of vegetables (excluding potatoes) or salad with my evening meal | True           | 576 (81.1%)   | 488 (78.3%)  | 0.2043  |
|                                                                                                     | False          | 134 (18.9%)   | 135 (21.7%)  |         |
| When I put butter or margarine on bread, I usually spread it thinly                                 | True           | 478 (67.3%)   | 434 (69.7%)  | 0.0008  |
|                                                                                                     | False          | 86 (12.1%)    | 104 (16.7%)  |         |
|                                                                                                     | Not applicable | 146 (20.6%)   | 85 (13.6%)   |         |
| If I have a packed lunch, I usually include some chocolate and/or biscuits                          | True           | 163 (22.9%)   | 145 (23.3%)  | 0.9734  |
|                                                                                                     | False          | 423 (59.6%)   | 372 (59.7%)  |         |
|                                                                                                     | Not applicable | 124 (17.5%)   | 106 (17.0%)  |         |
| I often have cream on desserts                                                                      | True           | 149 (21.0%)   | 142 (22.8%)  | 0.0789  |
|                                                                                                     | False          | 481 (67.7%)   | 389 (62.4%)  |         |
|                                                                                                     | Not applicable | 80 (11.3%)    | 92 (14.8%)   |         |

\* AFHC – Adolescents' Food Habits Checklist [37]; \*\* chi<sup>2</sup> test.

**Table S5.** The food consumption habits assessed while using Adolescents' Food Habits Checklist (AFHC) in the period before the COVID-19 pandemic, as declared by the adolescents from the Diet and Activity of Youth during COVID-19 (DAY-19) Study cohort (n = 1,333), stratified by gender.

| Food consumption habits assessed within AFHC*                       |                | Girls (n=710) | Boys (n=623) | p**    |
|---------------------------------------------------------------------|----------------|---------------|--------------|--------|
| I usually eat a dessert or pudding if there is one available        | True           | 505 (71.1%)   | 448 (71.9%)  | 0.7518 |
|                                                                     | False          | 205 (28.9%)   | 175 (28.1%)  |        |
| I make sure I eat at least one serving of fruit a day               | True           | 587 (82.7%)   | 510 (81.9%)  | 0.6976 |
|                                                                     | False          | 123 (17.3%)   | 113 (18.1%)  |        |
| I avoid eating lots of sausages and burgers                         | True           | 417 (58.7%)   | 366 (58.7%)  | 1.0000 |
|                                                                     | False          | 150 (21.1%)   | 193 (31.0%)  |        |
|                                                                     | Not applicable | 143 (20.2%)   | 64 (10.3%)   |        |
| I make sure I eat at least one serving of vegetables or salad a day | True           | 500 (70.4%)   | 449 (72.1%)  | 0.5076 |
|                                                                     | False          | 210 (29.6%)   | 174 (27.9%)  |        |
| I try to ensure I eat plenty of fruit and vegetables                | True           | 564 (79.4%)   | 445 (71.4%)  | 0.0007 |
|                                                                     | False          | 146 (20.6%)   | 178 (28.6%)  |        |
| I often eat sweet snacks between meals                              | True           | 338 (47.6%)   | 285 (45.7%)  | 0.4972 |
|                                                                     | False          | 372 (52.4%)   | 338 (54.3%)  |        |
| When I have a snack between meals, I often choose fruit             | True           | 335 (47.2%)   | 276 (44.3%)  | 0.0506 |
|                                                                     | False          | 287 (40.4%)   | 271 (43.5%)  |        |
|                                                                     | Not applicable | 88 (12.4%)    | 76 (12.2%)   |        |
| I eat at least three servings of fruit most days                    | True           | 341 (48.0%)   | 291 (46.7%)  | 0.6308 |
|                                                                     | False          | 369 (52.0%)   | 332 (53.3%)  |        |
| I generally try to have a healthy diet                              | True           | 513 (72.2%)   | 450 (72.2%)  | 1.0000 |
|                                                                     | False          | 197 (27.8%)   | 173 (27.8%)  |        |

\* AFHC – Adolescents' Food Habits Checklist [37]; \*\* chi<sup>2</sup> test.

**Table S6.** The food consumption habits assessed while using Adolescents' Food Habits Checklist (AFHC) in the period during the COVID-19 pandemic, as declared by the adolescents from the Diet and Activity of Youth during COVID-19 (DAY-19) Study cohort (n = 1,333), stratified by gender.

| Food consumption habits assessed within AFHC*                       |                | Girls (n=710) | Boys (n=623) | p**    |
|---------------------------------------------------------------------|----------------|---------------|--------------|--------|
| I usually eat a dessert or pudding if there is one available        | True           | 505 (71.5%)   | 458 (73.5%)  | 0.3312 |
|                                                                     | False          | 205 (28.5%)   | 165 (26.5%)  |        |
| I make sure I eat at least one serving of fruit a day               | True           | 632 (89.0%)   | 519 (83.3%)  | 0.0025 |
|                                                                     | False          | 78 (11.0%)    | 104 (16.7%)  |        |
| I avoid eating lots of sausages and burgers                         | True           | 435 (61.3%)   | 374 (60.0%)  | 1.0000 |
|                                                                     | False          | 131 (18.4%)   | 183 (29.4%)  |        |
|                                                                     | Not applicable | 144 (20.3%)   | 66 (10.6%)   |        |
| I make sure I eat at least one serving of vegetables or salad a day | True           | 573 (80.7%)   | 472 (75.8%)  | 0.0297 |
|                                                                     | False          | 137 (19.3%)   | 151 (24.2%)  |        |
| I try to ensure I eat plenty of fruit and vegetables                | True           | 622 (87.6%)   | 474 (76.1%)  | 1.0000 |
|                                                                     | False          | 88 (12.4%)    | 149 (23.9%)  |        |
| I often eat sweet snacks between meals                              | True           | 322 (45.3%)   | 319 (51.2%)  | 0.0329 |
|                                                                     | False          | 388 (54.7%)   | 304 (48.8%)  |        |
| When I have a snack between meals, I often choose fruit             | True           | 389 (54.8%)   | 297 (47.7%)  | 0.0131 |
|                                                                     | False          | 235 (33.1%)   | 254 (40.8%)  |        |
|                                                                     | Not applicable | 86 (12.1%)    | 72 (11.5%)   |        |
| I eat at least three servings of fruit most days                    | True           | 420 (59.1%)   | 334 (53.6%)  | 0.0416 |
|                                                                     | False          | 290 (40.9%)   | 289 (46.4%)  |        |
| I generally try to have a healthy diet                              | True           | 593 (83.5%)   | 475 (76.2%)  | 0.0009 |
|                                                                     | False          | 117 (16.5%)   | 148 (23.8%)  |        |

\* AFHC – Adolescents' Food Habits Checklist [37]; \*\* chi<sup>2</sup> test.

**Table S7.** The food purchase habits assessed while using Adolescents' Food Habits Checklist (AFHC) in the period before the COVID-19 pandemic, as declared by the adolescents from the Diet and Activity of Youth during COVID-19 (DAY-19) Study cohort (n = 1,333), stratified by urban/rural environment.

| Food purchase habits assessed within AFHC*                                               |                | Urban (n=973) | Rural (n=360) | p**    |
|------------------------------------------------------------------------------------------|----------------|---------------|---------------|--------|
| If I am having lunch away from home, I often choose a low-fat option                     | True           | 392 (40.3%)   | 146 (40.5%)   | 0.3977 |
|                                                                                          | False          | 278 (28.6%)   | 114 (31.6%)   |        |
|                                                                                          | Not applicable | 303 (31.1%)   | 100 (27.9%)   |        |
| If I am buying crisps, I often choose a low-fat brand                                    | True           | 216 (22.2%)   | 85 (23.6%)    | 0.4398 |
|                                                                                          | False          | 593 (60.9%)   | 206 (57.2%)   |        |
|                                                                                          | Not applicable | 164 (16.9%)   | 69 (19.2%)    |        |
| I often buy pastries or cakes                                                            | True           | 322 (33.1%)   | 127 (35.3%)   | 0.4538 |
|                                                                                          | False          | 651 (66.9%)   | 233 (64.7%)   |        |
| I rarely eat takeaway meals                                                              | True           | 785 (80.7%)   | 300 (83.3%)   | 0.2688 |
|                                                                                          | False          | 188 (19.3%)   | 60 (16.7%)    |        |
| When I am buying a soft drink, I usually choose a diet drink                             | True           | 333 (34.2%)   | 148 (41.1%)   | 0.0166 |
|                                                                                          | False          | 640 (65.8%)   | 212 (58.9%)   |        |
| If I am having a dessert or pudding in a restaurant, I usually choose the healthiest one | True           | 154 (15.8%)   | 60 (16.7%)    | 0.0429 |
|                                                                                          | False          | 440 (45.2%)   | 136 (37.8%)   |        |
|                                                                                          | Not applicable | 379 (30.0%)   | 164 (45.5%)   |        |

\* AFHC – Adolescents' Food Habits Checklist [37]; \*\* chi<sup>2</sup> test.

**Table S8.** The food purchase habits assessed while using Adolescents' Food Habits Checklist (AFHC) in the period during the COVID-19 pandemic, as declared by the adolescents from the Diet and Activity of Youth during COVID-19 (DAY-19) Study cohort (n = 1,333), stratified by urban/rural environment.

| Food purchase habits assessed within AFHC*                                               |                | Urban (n=973) | Rural (n=360) | p**    |
|------------------------------------------------------------------------------------------|----------------|---------------|---------------|--------|
| If I am having lunch away from home, I often choose a low-fat option                     | True           | 322 (33.1%)   | 131 (36.4%)   | 0.2967 |
|                                                                                          | False          | 277 (28.5%)   | 88 (24.4%)    |        |
|                                                                                          | Not applicable | 374 (38.4%)   | 141 (39.2%)   |        |
| If I am buying crisps, I often choose a low-fat brand                                    | True           | 236 (24.2%)   | 95 (26.4%)    | 0.1561 |
|                                                                                          | False          | 545 (56.0%)   | 181 (50.3%)   |        |
|                                                                                          | Not applicable | 192 (19.8%)   | 84 (76.7%)    |        |
| I often buy pastries or cakes                                                            | True           | 233 (24.0%)   | 89 (24.7%)    | 0.7693 |
|                                                                                          | False          | 740 (76.0%)   | 271 (75.3%)   |        |
| I rarely eat takeaway meals                                                              | True           | 803 (82.5%)   | 305 (84.7%)   | 0.3425 |
|                                                                                          | False          | 170 (17.5%)   | 55 (15.3%)    |        |
| When I am buying a soft drink, I usually choose a diet drink                             | True           | 368 (37.8%)   | 162 (45.0%)   | 0.0174 |
|                                                                                          | False          | 605 (62.2%)   | 198 (55.0%)   |        |
| If I am having a dessert or pudding in a restaurant, I usually choose the healthiest one | True           | 162 (16.6%)   | 64 (17.8%)    | 0.0222 |
|                                                                                          | False          | 412 (42.3%)   | 123 (34.2%)   |        |
|                                                                                          | Not applicable | 399 (41.1%)   | 173 (48.0%)   |        |

\* AFHC – Adolescents' Food Habits Checklist [37]; \*\* chi<sup>2</sup> test.

**Table S9.** The food preparation habits assessed while using Adolescents' Food Habits Checklist (AFHC) in the period before the COVID-19 pandemic, as declared by the adolescents from the Diet and Activity of Youth during COVID-19 (DAY-19) Study cohort (n = 1,333), stratified by urban/rural environment.

| Food preparation habits assessed within AFHC*                                                       |                | Urban (n=973) | Rural (n=360) | p**    |
|-----------------------------------------------------------------------------------------------------|----------------|---------------|---------------|--------|
| I usually avoid eating fried foods                                                                  | True           | 365 (37.5%)   | 144 (40.0%)   | 0.4065 |
|                                                                                                     | False          | 608 (62.5%)   | 216 (60.0%)   |        |
| I try to keep my overall fat intake down                                                            | True           | 528 (54.3%)   | 196 (54.4%)   | 0.9563 |
|                                                                                                     | False          | 445 (45.7%)   | 164 (45.6%)   |        |
| I try to keep my overall sugar intake down                                                          | True           | 532 (54.7%)   | 209 (58.0%)   | 0.2701 |
|                                                                                                     | False          | 441 (45.3%)   | 151 (42.0%)   |        |
| If I am having a dessert at home, I try to have something low in fat                                | True           | 303 (31.1%)   | 130 (36.1%)   | 0.1668 |
|                                                                                                     | False          | 510 (52.4%)   | 169 (46.9%)   |        |
|                                                                                                     | Not applicable | 160 (16.5%)   | 61 (17.0%)    |        |
| I usually eat at least one serving of vegetables (excluding potatoes) or salad with my evening meal | True           | 728 (74.8%)   | 278 (77.2%)   | 0.3655 |
|                                                                                                     | False          | 245 (25.2%)   | 82 (22.8%)    |        |
| When I put butter or margarine on bread, I usually spread it thinly                                 | True           | 653 (67.1%)   | 263 (73.0%)   | 0.0618 |
|                                                                                                     | False          | 157 (16.1%)   | 41 (11.4%)    |        |
|                                                                                                     | Not applicable | 163 (16.8%)   | 56 (15.6%)    |        |
| If I have a packed lunch, I usually include some chocolate and/or biscuits                          | True           | 324 (33.3%)   | 111 (30.9%)   | 0.0638 |
|                                                                                                     | False          | 532 (54.7%)   | 219 (60.8%)   |        |
|                                                                                                     | Not applicable | 117 (12.0%)   | 30 (8.3%)     |        |
| I often have cream on desserts                                                                      | True           | 210 (21.6%)   | 78 (21.7%)    | 0.7294 |
|                                                                                                     | False          | 651 (66.9%)   | 235 (65.3%)   |        |
|                                                                                                     | Not applicable | 112 (11.5%)   | 47 (13.0%)    |        |

\* AFHC – Adolescents' Food Habits Checklist [37]; \*\* chi<sup>2</sup> test.

**Table S10.** The food preparation habits assessed while using Adolescents' Food Habits Checklist (AFHC) in the period during the COVID-19 pandemic, as declared by the adolescents from the Diet and Activity of Youth during COVID-19 (DAY-19) Study cohort (n = 1,333), stratified by urban/rural environment.

| Food preparation habits assessed within AFHC*                                                       |                | Urban (n=973) | Rural (n=360) | p**    |
|-----------------------------------------------------------------------------------------------------|----------------|---------------|---------------|--------|
| I usually avoid eating fried foods                                                                  | True           | 387 (39.8%)   | 149 (41.4%)   | 0.5934 |
|                                                                                                     | False          | 586 (60.2%)   | 211 (58.6%)   |        |
| I try to keep my overall fat intake down                                                            | True           | 577 (59.3%)   | 223 (61.9%)   | 0.3818 |
|                                                                                                     | False          | 396 (40.7%)   | 137 (38.1%)   |        |
| I try to keep my overall sugar intake down                                                          | True           | 588 (60.4%)   | 234 (65.0%)   | 0.1277 |
|                                                                                                     | False          | 385 (39.6%)   | 126 (35.0%)   |        |
| If I am having a dessert at home, I try to have something low in fat                                | True           | 344 (35.4%)   | 139 (38.6%)   | 0.4269 |
|                                                                                                     | False          | 479 (49.2%)   | 163 (45.3%)   |        |
|                                                                                                     | Not applicable | 150 (15.4%)   | 58 (16.1%)    |        |
| I usually eat at least one serving of vegetables (excluding potatoes) or salad with my evening meal | True           | 773 (79.4%)   | 291 (80.8%)   | 0.5752 |
|                                                                                                     | False          | 200 (20.6%)   | 69 (19.2%)    |        |
| When I put butter or margarine on bread, I usually spread it thinly                                 | True           | 659 (67.7%)   | 253 (70.3%)   | 0.2573 |
|                                                                                                     | False          | 148 (15.2%)   | 42 (11.7%)    |        |
|                                                                                                     | Not applicable | 166 (17.1%)   | 65 (18.0%)    |        |
| If I have a packed lunch, I usually include some chocolate and/or biscuits                          | True           | 234 (24.0%)   | 74 (20.6%)    | 0.0233 |
|                                                                                                     | False          | 559 (57.5%)   | 236 (65.5%)   |        |
|                                                                                                     | Not applicable | 180 (18.5%)   | 50 (13.9%)    |        |
| I often have cream on desserts                                                                      | True           | 214 (21.9%)   | 77 (21.4%)    | 0.8033 |
|                                                                                                     | False          | 637 (65.5%)   | 233 (64.7%)   |        |
|                                                                                                     | Not applicable | 122 (12.6%)   | 50 (13.9%)    |        |

\* AFHC – Adolescents' Food Habits Checklist [37]; \*\* chi<sup>2</sup> test.

**Table S11.** The food consumption habits assessed while using Adolescents' Food Habits Checklist (AFHC) in the period before the COVID-19 pandemic, as declared by the adolescents from the Diet and Activity of Youth during COVID-19 (DAY-19) Study cohort (n = 1,333), stratified by urban/rural environment.

| Food consumption habits assessed within AFHC*                       |                | Urban (n=973) | Rural (n=360) | p**    |
|---------------------------------------------------------------------|----------------|---------------|---------------|--------|
| I usually eat a dessert or pudding if there is one available        | True           | 689 (70.8%)   | 264 (73.3%)   | 0.3652 |
|                                                                     | False          | 284 (29.2%)   | 96 (26.7%)    |        |
| I make sure I eat at least one serving of fruit a day               | True           | 797 (81.9%)   | 300 (83.3%)   | 0.5457 |
|                                                                     | False          | 176 (18.1%)   | 60 (16.7%)    |        |
| I avoid eating lots of sausages and burgers                         | True           | 557 (57.2%)   | 226 (62.8%)   | 0.0844 |
|                                                                     | False          | 253 (26.0%)   | 90 (25.0%)    |        |
|                                                                     | Not applicable | 163 (16.8%)   | 44 (12.2%)    |        |
| I make sure I eat at least one serving of vegetables or salad a day | True           | 691 (71.0%)   | 258 (71.7%)   | 0.8162 |
|                                                                     | False          | 282 (29.0%)   | 102 (28.2%)   |        |
| I try to ensure I eat plenty of fruit and vegetables                | True           | 728 (74.8%)   | 281 (78.0%)   | 0.2214 |
|                                                                     | False          | 245 (25.2%)   | 79 (22.0%)    |        |
| I often eat sweet snacks between meals                              | True           | 461 (47.4%)   | 162 (45.0%)   | 0.4393 |
|                                                                     | False          | 512 (52.6%)   | 198 (55.0%)   |        |
| When I have a snack between meals, I often choose fruit             | True           | 434 (44.6%)   | 177 (49.2%)   | 0.3310 |
|                                                                     | False          | 417 (42.8%)   | 141 (39.2%)   |        |
|                                                                     | Not applicable | 122 (12.6%)   | 42 (11.6%)    |        |
| I eat at least three servings of fruit most days                    | True           | 436 (44.8%)   | 196 (54.4%)   | 0.0018 |
|                                                                     | False          | 537 (55.2%)   | 164 (45.6%)   |        |
| I generally try to have a healthy diet                              | True           | 706 (72.5%)   | 257 (71.4%)   | 0.6722 |
|                                                                     | False          | 267 (27.5%)   | 103 (28.6%)   |        |

\* AFHC – Adolescents' Food Habits Checklist [37]; \*\* chi<sup>2</sup> test.

**Table S12.** The food consumption habits assessed while using Adolescents' Food Habits Checklist (AFHC) in the period during the COVID-19 pandemic, as declared by the adolescents from the Diet and Activity of Youth during COVID-19 (DAY-19) Study cohort (n = 1,333), stratified by urban/rural environment.

| Food consumption habits assessed within AFHC*                       |                | Urban (n=973) | Rural (n=360) | p**    |
|---------------------------------------------------------------------|----------------|---------------|---------------|--------|
| I usually eat a dessert or pudding if there is one available        | True           | 702 (72.4%)   | 261 (72.5%)   | 0.8993 |
|                                                                     | False          | 271 (27.6%)   | 99 (27.5%)    |        |
| I make sure I eat at least one serving of fruit a day               | True           | 830 (85.3%)   | 321 (89.2%)   | 0.0681 |
|                                                                     | False          | 143 (14.7%)   | 39 (10.8%)    |        |
| I avoid eating lots of sausages and burgers                         | True           | 577 (59.3%)   | 232 (64.4%)   | 0.1871 |
|                                                                     | False          | 234 (24.0%)   | 80 (22.2%)    |        |
|                                                                     | Not applicable | 162 (16.7%)   | 48 (13.4%)    |        |
| I make sure I eat at least one serving of vegetables or salad a day | True           | 747 (76.8%)   | 298 (82.8%)   | 0.0180 |
|                                                                     | False          | 226 (23.2%)   | 62 (17.2%)    |        |
| I try to ensure I eat plenty of fruit and vegetables                | True           | 788 (81.0%)   | 308 (85.5%)   | 0.0527 |
|                                                                     | False          | 185 (19.0%)   | 52 (14.5%)    |        |
| I often eat sweet snacks between meals                              | True           | 466 (47.9%)   | 175 (48.6%)   | 0.8162 |
|                                                                     | False          | 507 (52.1%)   | 185 (51.4%)   |        |
| When I have a snack between meals, I often choose fruit             | True           | 482 (49.5%)   | 204 (56.7%)   | 0.0678 |
|                                                                     | False          | 372 (38.2%)   | 117 (32.5%)   |        |
|                                                                     | Not applicable | 119 (12.3%)   | 39 (10.8%)    |        |
| I eat at least three servings of fruit most days                    | True           | 525 (53.9%)   | 229 (63.6%)   | 0.0016 |
|                                                                     | False          | 448 (46.1%)   | 131 (36.4%)   |        |
| I generally try to have a healthy diet                              | True           | 770 (79.1%)   | 298 (82.8%)   | 0.1392 |
|                                                                     | False          | 203 (20.9%)   | 62 (17.2%)    |        |

\* AFHC – Adolescents' Food Habits Checklist [37]; \*\* chi<sup>2</sup> test.
